# Supplementary material
Source: MDPI journal article supplement (https://www.mdpi.com/search?q=forests-11-01109)
Supplement: s001 [file forests-11-01109-s001.pdf]

## Supplementary material -1

**Table S1.** Summary of the Similarity Percentage (SIMPER) analysis showing contrasts between the cumulative total contribution (50% cut-off) and the contribution (%) of the most influential fungal operational taxonomic units to the dissimilarity of the soil fungi detected in three *Pinus patula* stands of different age groups in a plantation in Wondo Genet, Ethiopia.

| Species                                 | % of individual contribution to the dissimilarity |                                                   |
|-----------------------------------------|---------------------------------------------------|---------------------------------------------------|
|                                         | 5- and 11-year-old stands                         | % of cumulative contribution to the dissimilarity |
| <i>Pustularia</i> sp.                   | 6.71                                              | 6.71                                              |
| <i>Wilcoxina mikolae</i>                | 3.78                                              | 10.49                                             |
| <i>Ascobolus</i> sp.                    | 3.55                                              | 14.04                                             |
| <i>Cryptococcus podzolicus</i>          | 3.22                                              | 17.25                                             |
| <i>Mortierella</i> sp.                  | 2.99                                              | 20.24                                             |
| <i>Myrmecridium phragmitis</i>          | 2.88                                              | 23.12                                             |
| <i>Podospora longicaudata</i>           | 2.87                                              | 25.99                                             |
| <i>Lectera longa</i>                    | 2.82                                              | 28.82                                             |
| <i>Chaetosphaeria vermicularioides</i>  | 2.72                                              | 31.53                                             |
| <i>Halokirschsteiniothelia maritima</i> | 2.69                                              | 34.23                                             |
| <i>Alternaria</i> sp.                   | 2.57                                              | 36.80                                             |
| <i>Neonectria</i> sp.                   | 2.23                                              | 39.03                                             |
| <i>Fusarium buharicum</i>               | 1.87                                              | 40.90                                             |
| <i>Preussia</i> sp.                     | 1.54                                              | 42.44                                             |
| <i>Xylaria venosula</i>                 | 1.47                                              | 43.91                                             |
| <i>Cylindrocarpon</i> sp.               | 1.45                                              | 45.36                                             |
| <i>Oidiodendron griseum</i>             | 1.44                                              | 46.80                                             |
| <i>Phomopsis columnaris</i>             | 1.41                                              | 48.20                                             |
| <i>Pyrenochaeta</i> sp.                 | 1.09                                              | 49.29                                             |
| <i>Dactylonectria macrodidyma</i>       | 1.08                                              | 50.36                                             |
| <i>Mortierella</i> sp.                  | 1.02                                              | 51.39                                             |
| <i>Mortierella exigua</i>               | 0.99                                              | 52.38                                             |
| 5- and 36-year-old stands               |                                                   |                                                   |
| <i>Schizothecium conicum</i>            | 4.00                                              | 4.00                                              |
| <i>Ascobolus</i> sp.                    | 3.63                                              | 7.64                                              |
| <i>Cryptococcus podzolicus</i>          | 3.63                                              | 11.27                                             |
| <i>Pustularia</i> sp.                   | 3.37                                              | 14.64                                             |
| <i>Mortierella</i> sp.                  | 3.17                                              | 17.81                                             |
| <i>Lectera longa</i>                    | 2.89                                              | 20.70                                             |
| <i>Podospora longicaudata</i>           | 2.88                                              | 23.57                                             |
| <i>Halokirschsteiniothelia maritima</i> | 2.76                                              | 26.33                                             |
| <i>Alternaria</i> sp.                   | 2.63                                              | 28.96                                             |
| <i>Chaetosphaeria vermicularioides</i>  | 2.61                                              | 31.57                                             |
| <i>Pseudaleuria</i> sp.                 | 2.59                                              | 34.17                                             |
| <i>Cylindrocarpon</i> sp.               | 2.46                                              | 36.63                                             |
| <i>Wilcoxina mikolae</i>                | 2.22                                              | 38.85                                             |

|                                   |       |       |
|-----------------------------------|-------|-------|
| <i>Neonectria</i> sp.             | 1.94  | 40.79 |
| <i>Oidiodendron griseum</i>       | 1.67  | 42.45 |
| <i>Saccharomycopsis vini</i>      | 1.61  | 44.06 |
| <i>Fusarium buharicum</i>         | 1.52  | 45.58 |
| <i>Xylaria venosula</i>           | 1.45  | 47.02 |
| <i>Acrostalagmus luteoalbus</i>   | 1.38  | 48.40 |
| <i>Phomopsis columnaris</i>       | 1.33  | 49.73 |
| <i>Pyrenochaeta</i> sp.           | 1.11  | 50.85 |
| <b>11- and 36-year-old stands</b> |       |       |
| <i>Pustularia</i> sp.             | 16.11 | 16.11 |
| <i>Wilcoxina mikolae</i>          | 9.20  | 25.32 |
| <i>Schizothecium conicum</i>      | 6.61  | 31.93 |
| <i>Myrmecridium phragmitis</i>    | 4.99  | 36.92 |
| <i>Pseudaleuria</i> sp.           | 3.27  | 40.19 |
| <i>Cylindrocarpon</i> sp.         | 2.89  | 43.08 |
| <i>Preussia</i> sp.               | 2.65  | 45.73 |
| <i>Mortierella</i> sp.            | 2.09  | 47.83 |
| <i>Saccharomycopsis vini</i>      | 2.02  | 49.85 |
